# Supplementary material
Source: publisher figshare collection journal article supplement (https://tandf.figshare.com/ndownloader/files/17505725)

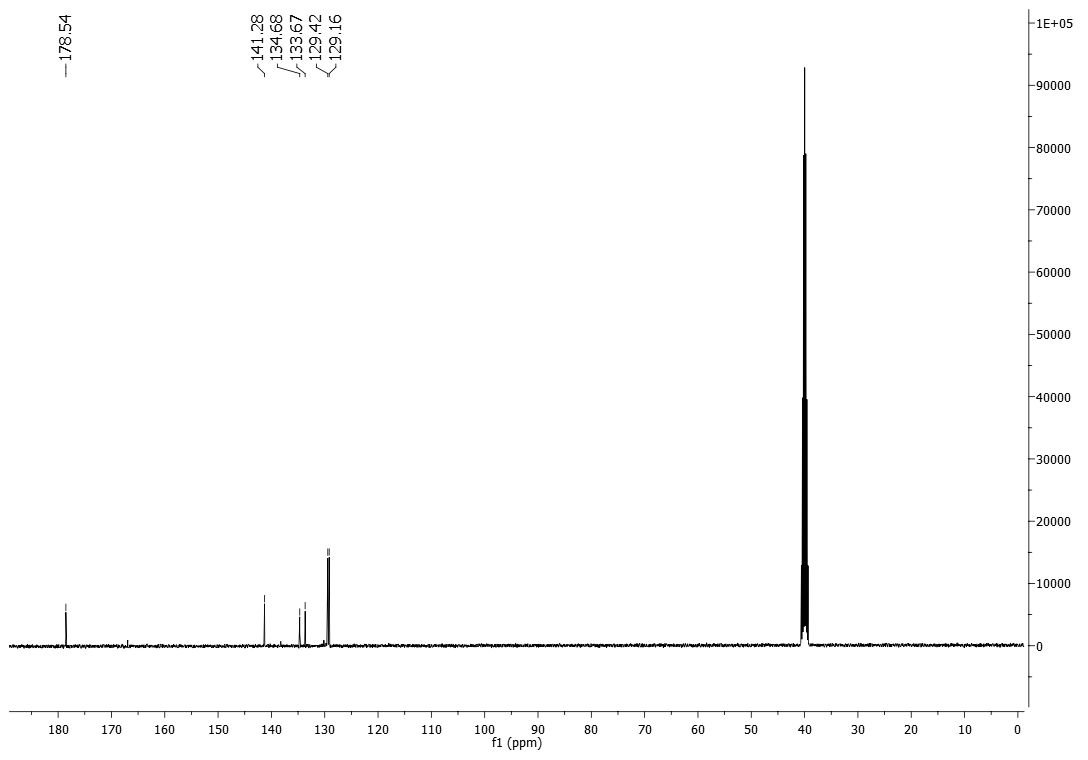

Supplement: Supplementary file 1 [file 17505725]
